# Supplementary material
Source: publisher figshare collection journal article supplement (https://acs.figshare.com/ndownloader/files/12833828)
Supplement: Supplementary file 1 [file 12833828]

## Supporting Information

### Ultra-thin and Strong Electrospun Porous Fiber Separator

Jiao-Long Pan,<sup>†,‡</sup> Ze Zhang,<sup>†,‡</sup> Hai Zhang,<sup>†</sup> Pei-Pei Zhu,<sup>†</sup> Jun-Chao Wei,<sup>†</sup> Jian-Xin Cai,<sup>‡</sup> Ji Yu,<sup>†</sup> Nikhil Koratkar,<sup>\*,§,||</sup> and Zhen-Yu Yang<sup>\*,†</sup>

<sup>†</sup>School of Chemistry, Nanchang University, Nanchang, Jiangxi 330031, People's Republic of China

<sup>‡</sup>School of Resources and Environmental Science, Nanchang University, Nanchang, Jiangxi 330031, People's Republic of China

<sup>§</sup>Department of Mechanical, Aerospace and Nuclear Engineering, Rensselaer Polytechnic Institute, 110 Eighth Street, Troy, New York 12180, United States

<sup>||</sup>Department of Materials Science and Engineering, Rensselaer Polytechnic Institute, 110 Eighth Street, Troy, New York 12180, United States

\*E-mail: [zyyang@ncu.edu.cn](mailto:zyyang@ncu.edu.cn); (Zhenyu Yang) [koratn@rpi.edu](mailto:koratn@rpi.edu) (Nikhil Koratkar)

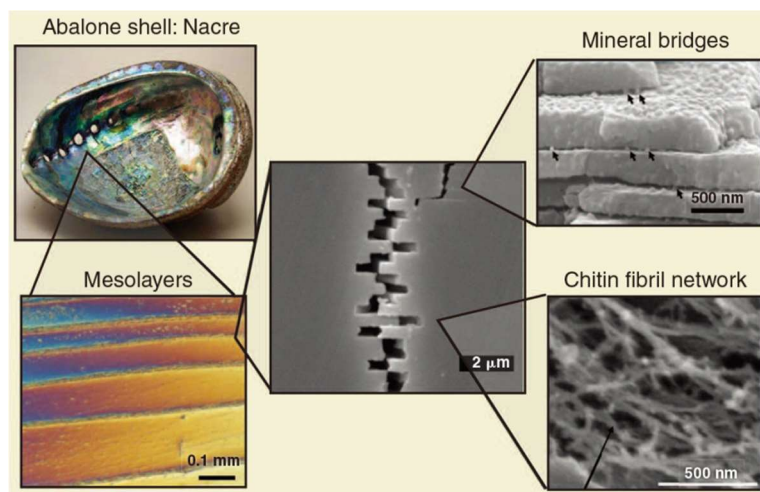

**Figure S1.** Hierarchical structures of tough biological materials (Abalone nacre) with growth layers (mesolayers), the fibrous chitin network (organic-inorganic layer) and multilayer heterogeneous interfaces (mineral bridges).

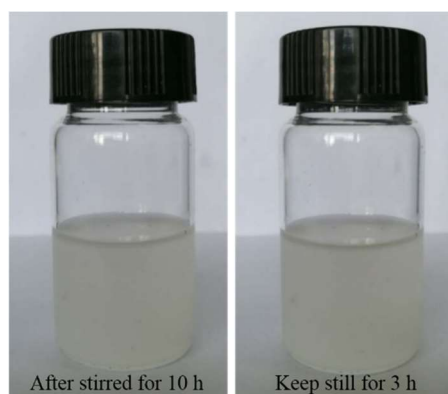

**Figure S2.** Photographs of the PVdF/DMF solution used for electrospinning containing ~10 wt.%  $\text{NH}_4\text{HCO}_3$  and ~15 wt.% treated  $\text{SiO}_2$  NPs. The  $\text{SiO}_2$  NPs show good dispersion even after 3 hours without any stirring.

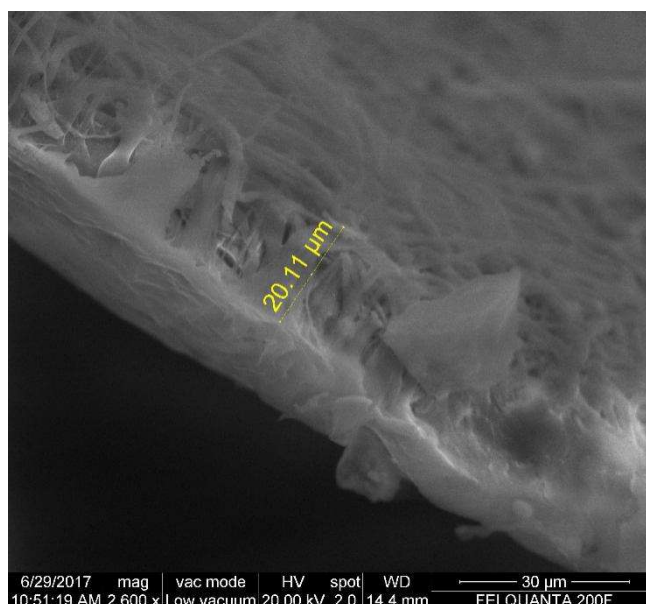

**Figure S3.** The cross-section SEM image of the composite separator.

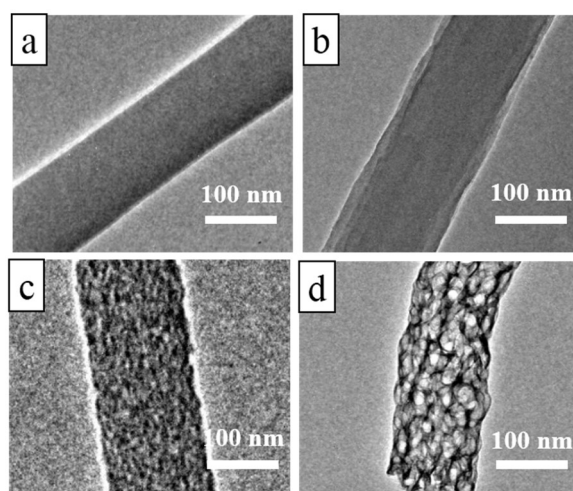

**Figure S4.** TEM images of PE fibers of PVdF/PE/PVdF separator with various  $\text{NH}_4\text{HCO}_3$  contents: (a) 0 wt.%; (b) 5 wt.%; (c) 10 wt.%; (d) 15 wt.%.

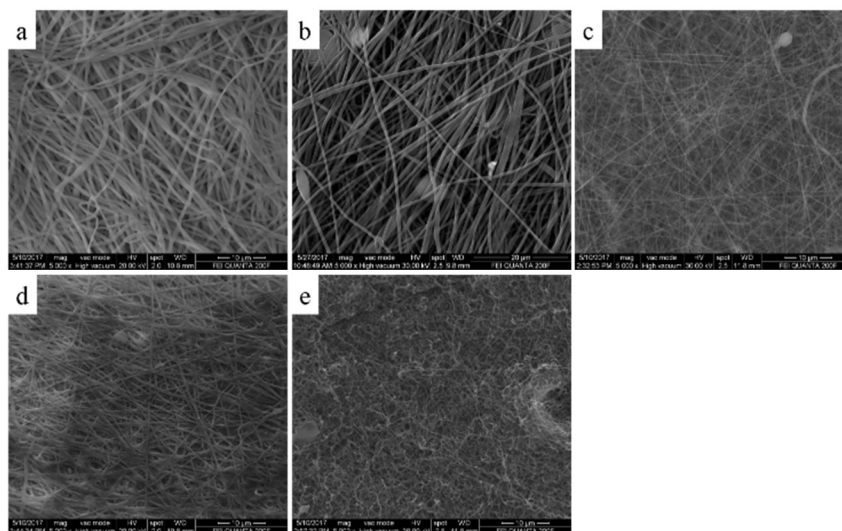

**Figure S5.** Low-resolution SEM images of the surface morphology for the PVdF/PE/PVdF separator with various amount of SiO<sub>2</sub> NPs: (a) 0 wt.%, (b) 5 wt. %, (c) 10 wt. %, (d) 15 wt. % and (e) 20 wt.%.

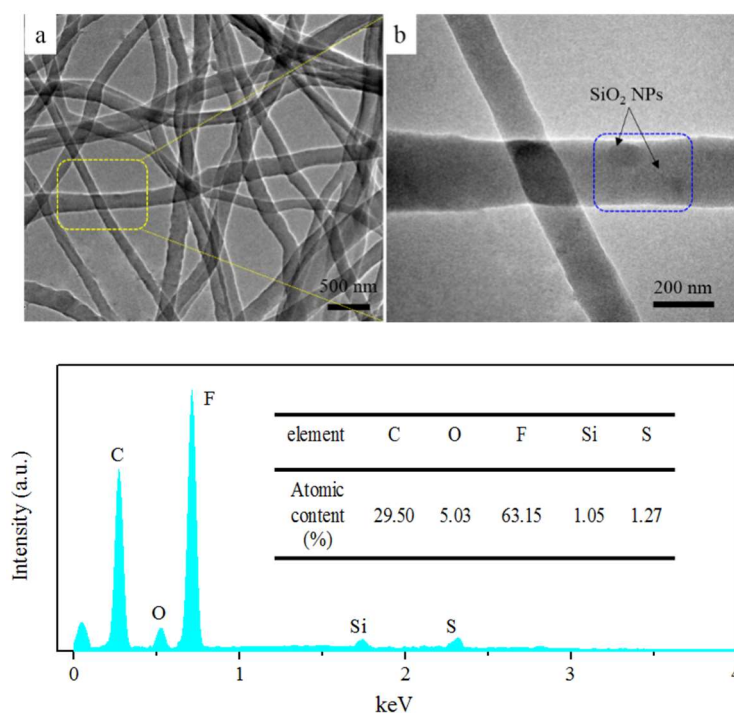

**Figure S6.** The low (a) and high-resolution (b) TEM images of PVdF fibers decorated with SiO<sub>2</sub> NPs (~15 wt.%) and the corresponding EDS results from the selected section (blue).

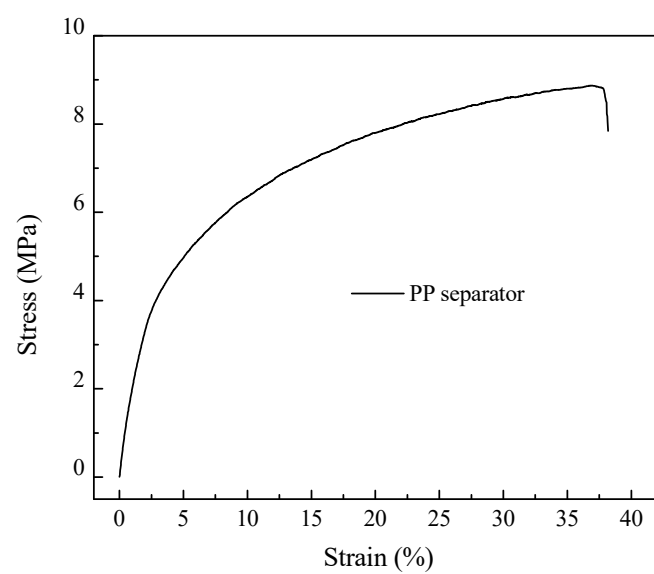

**Figure S7.** The stress-strain curve of the commercial PP separator.
